# Supplementary material for: Sandwich-like SnS2/graphene multilayers for efficient lithium/sodium storage
Source: Royal Society of Chemistry journal article supplement (doi:10.1039/d1dt00781e), 2021-01-01
Supplement: d1dt00781e1.pdf [file d1dt00781e1.pdf]

## Supporting Information

### Sandwich-like SnS<sub>2</sub>/graphene multilayers for efficient lithium/sodium storages

Jiande Liu,<sup>ab</sup> Yingfan Chang,<sup>a</sup> Chen Chen,<sup>a</sup> Pengqian Guo,<sup>a</sup> Kai Sun,<sup>a</sup> Dianliang Cao,<sup>ab</sup> Yaodong Ma,<sup>a</sup> Dequan Liu,<sup>a</sup> Qiming Liu,<sup>a</sup> Jie Liu,<sup>b</sup> and Deyan He,<sup>\*a</sup>

<sup>a</sup>School of Physical Science and Technology, and Key Laboratory for Magnetism and Magnetic Materials of the Ministry of Education, Lanzhou University, Lanzhou 730000, China

<sup>b</sup>Institute of Modern Physics, Chinese Academy of Sciences, Lanzhou 730000, China

\*Corresponding author.

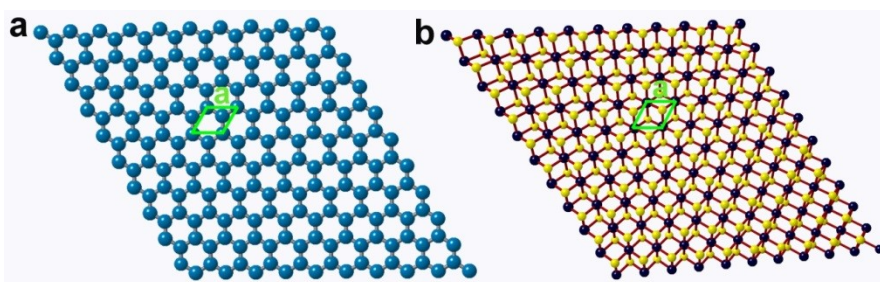

**Fig. S1** In-plane structures of (a) graphene nanosheet with a hexagonal unit cell,  $a = 0.2460$  nm, and (b) SnS<sub>2</sub> nanosheet with a hexagonal unit cell,  $a = 0.3649$  nm. To attain full hybridization via a solution-phase direct assembly method, the mixing mass ratio was calculated based on a hypothesized area-matching model. As an approximate, the ideal graphene structure was used to estimate the area matching between PDDA-graphene and SnS<sub>2</sub>. The area weight density for graphene is  $W(\text{graphene}) = 2M(\text{C}) / (a \times a \times \sin 120^\circ \times N_A)$ , and the one for SnS<sub>2</sub> is  $W(\text{SnS}_2) = 2M(\text{SnS}_2) / (a \times c \times N_A)$ , where  $N_A$  is Avogadro's number,  $M(\text{C})$  and  $M(\text{SnS}_2)$  are the formula weights of carbon and SnS<sub>2</sub>, respectively. Accordingly, the mass ratio between SnS<sub>2</sub> and PDDA-graphene under the area balance 1:1 is  $m(\text{SnS}_2)/m(\text{graphene}) = W(\text{SnS}_2)/W(\text{graphene}) = \sim 3.45:1$ .

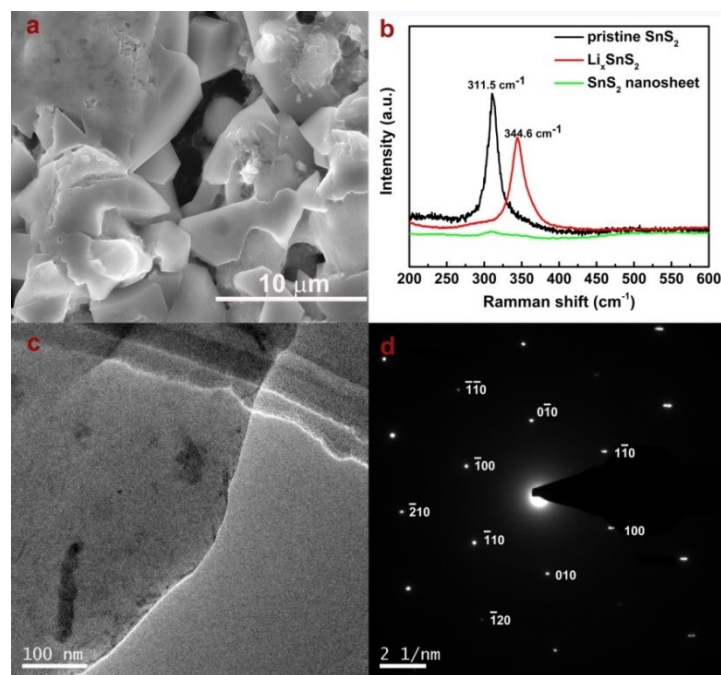

**Fig. S2** (a) SEM image of the  $\text{Li}_x\text{SnS}_2$ . (b) Raman spectra of the pristine  $\text{SnS}_2$ ,  $\text{Li}_x\text{SnS}_2$  and exfoliated  $\text{SnS}_2$  nanosheets. (c) TEM image and (d) corresponding SAED pattern of the exfoliated  $\text{SnS}_2$  nanosheets.

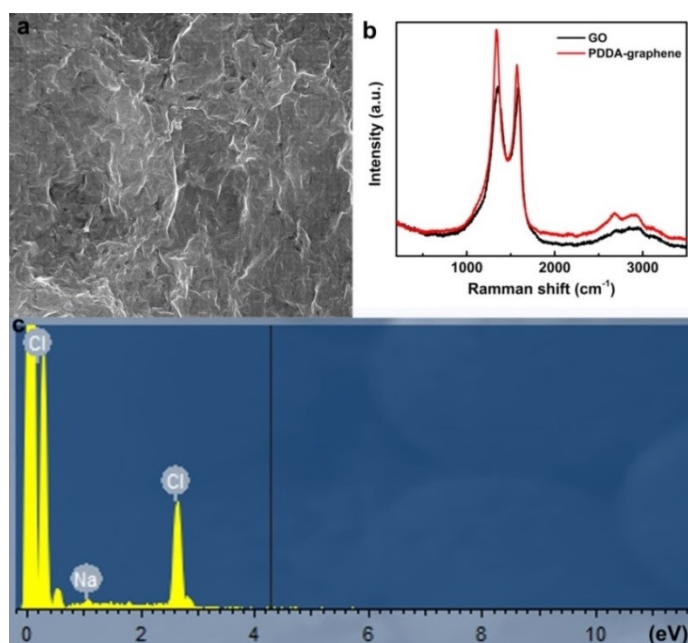

**Fig. S3** (a) SEM image and (c) the corresponding EDS image of PDDA-graphene nanosheets. (b) Raman spectra of GO and PDDA-graphene nanosheets.

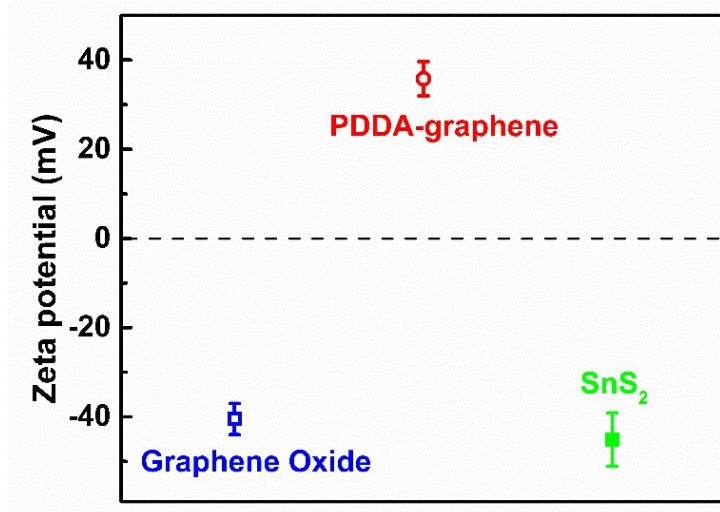

**Fig. S4** Zeta-potentials of suspensions for the graphene oxide, PDDA-graphene and the exfoliated SnS<sub>2</sub> nanosheets.

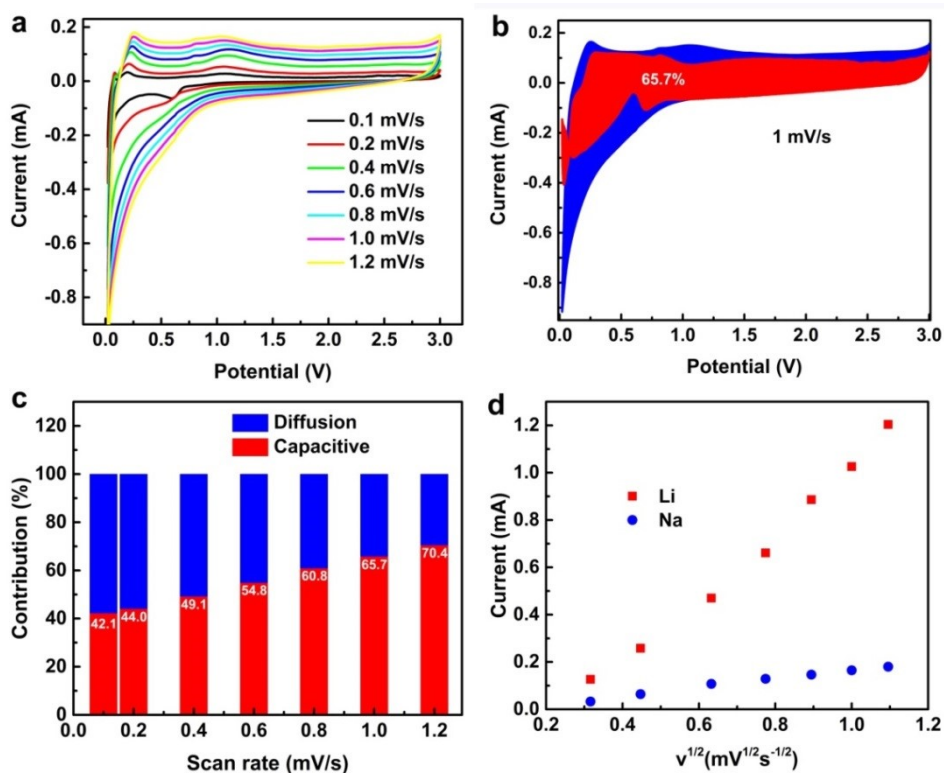

**Fig. S5** (a) CV curves of the SnS<sub>2</sub>/graphene multilayers anode under different scan rates for sodium storage. (b) Normalized contribution ratio of the capacitive to diffusion currents for the SnS<sub>2</sub>/graphene multilayers at a scan rate of 1 mV s<sup>-1</sup>. (c) Contribution of the capacitive and

diffusion-controlled charge transport processes at different scan rates. (d) Linear relationship between anode peak current ( $i_p$ ) and square root of scan rate ( $v^{1/2}$ ) for two kinds of batteries.

The Randles-Sevcik equation is utilized to calculate the diffusion coefficients ( $D$ ,  $\text{cm}^2\text{s}^{-1}$ ) of lithium and sodium ions during discharge and charge processes.

$$i_p = 2.69 \times 10^5 n^{3/2} A D_{1/2} v^{1/2} C_{\text{Li}^+/\text{Na}^+}$$

where  $i_p$  is the anodic peak current (A),  $n$  is the transferring electron number per molecule oxidized,  $A$  is the surface area of electrode ( $\text{cm}^2$ ),  $v$  is the scan rate ( $\text{V s}^{-1}$ ), and  $C_{\text{Li}^+/\text{Na}^+}$  is the concentration of  $\text{Li}^+$  or  $\text{Na}^+$  in electrolyte ( $1 \text{ mol L}^{-1}$ ). According to the above equation, we can know that there is a linear relationship between  $i_p$  and  $v^{1/2}$ . Based on the varied anodic  $i_p$  at different scan rates, the fitting lines are presented in Fig. S5d. The slopes of the  $\text{SnS}_2/\text{graphene}$  multilayers anodes are 1.39 and 0.19 for LIB and SIB, respectively. Then, we can calculate the lithium and sodium diffusion coefficients in the  $\text{SnS}_2/\text{graphene}$  multilayers based on the charge number of the oxidation reaction and the specific area of the electrode, which are  $1.04 \times 10^{-8}$  and  $1.86 \times 10^{-10} \text{ cm}^2/\text{s}$ , respectively.

**Table s1** Comparison of the cycling stability and rate capability of the SnS<sub>2</sub>-based composites electrodes.

| Materials                                   |    | Initial discharge capacity (mAh g <sup>-1</sup> ), Initial coulombic efficiency, (Current density, (mA g <sup>-1</sup> )) | Cycling stability capacity (mAh g <sup>-1</sup> ), (Cycle number, Current density (mA g <sup>-1</sup> )) | Rate capability (mAh g <sup>-1</sup> ), (Current density (A g <sup>-1</sup> )) |                 |                 |                 |               | Ref.             |
|---------------------------------------------|----|---------------------------------------------------------------------------------------------------------------------------|----------------------------------------------------------------------------------------------------------|--------------------------------------------------------------------------------|-----------------|-----------------|-----------------|---------------|------------------|
| <b>SnS<sub>2</sub>/graphene multilayers</b> | Li | <b>1016,61%(200)</b>                                                                                                      | <b>160(2000,2000)</b>                                                                                    | <b>502(0.1)</b>                                                                | <b>330(0.5)</b> | <b>273(1)</b>   | <b>206(2)</b>   | <b>171(3)</b> | <b>This work</b> |
|                                             | Na | <b>1001,41.6%(200)</b>                                                                                                    | <b>142(1000,1000)</b>                                                                                    | <b>415(0.1)</b>                                                                | <b>282(0.2)</b> | <b>225(0.3)</b> | <b>185(0.5)</b> | <b>141(1)</b> |                  |
| SnS <sub>2</sub> /graphene AS               | Li | 4030, 37% (50)                                                                                                            | 656(50, 30)                                                                                              | 642(0.05)                                                                      | 525(0.1)        | 419(0.25)       | 325(0.5)        | 240(1)        | <b>s1</b>        |
| SnS <sub>2</sub> @graphene                  | Li | 1740, (330)                                                                                                               | 504(200,330)                                                                                             |                                                                                |                 |                 |                 |               | <b>s2</b>        |
| SnS <sub>2</sub> -RGO                       | Li | 1505,71.6%                                                                                                                | 657(40,660)                                                                                              |                                                                                |                 |                 |                 |               | <b>s3</b>        |
| graphene/SnS <sub>2</sub> /CC               | Li | 1987.4, 52.5% (500)                                                                                                       | 638.1(150,500)                                                                                           | 725.9(0.3)                                                                     | 723.8(0.6)      | 641.2(1)        | 540(1.5)        | 419(2)        | <b>s4</b>        |
| MC-SnS <sub>2</sub> NSs                     | Li | 1552.9(100)                                                                                                               | 428.8(50,100)                                                                                            |                                                                                |                 |                 |                 |               | <b>s5</b>        |
| SnS <sub>2</sub> -rGO                       | Li | 1032,73.4% (100)                                                                                                          | 534(100,100)                                                                                             |                                                                                |                 |                 |                 |               | <b>s6</b>        |
| SnS <sub>2</sub> -graphene                  | Li | 967.6,79.2 % (0.2C)                                                                                                       | 570.0(30,0.2C)                                                                                           |                                                                                |                 |                 |                 |               | <b>s7</b>        |
| SnS <sub>2</sub> /polypyrrole               | Li | 1567,76.6% (100)                                                                                                          | 523(30,100)                                                                                              |                                                                                |                 |                 |                 |               | <b>s8</b>        |
| rGO-SnS <sub>2</sub> Hybrid                 | Li | 1600, (100)                                                                                                               |                                                                                                          | 600(0.1)                                                                       |                 |                 |                 | 400(1.2)      | <b>s9</b>        |
| SnS <sub>2</sub> /3DG hybrid                | Li | 1559,53.1%(200)                                                                                                           | 451(50,1000)                                                                                             | 771(0.2)                                                                       | 570(0.5)        | 529 (0.8)       | 433(1)          | 174(2)        | <b>s10</b>       |
| LEGr@SnS <sub>2</sub>                       | Li | 1061,75%(300)                                                                                                             | 664 (200,300)                                                                                            | 1022(0.1)                                                                      | 983(0.2)        | 682(0.5)        | 557(0.8)        | 467(1)        | <b>s11</b>       |
| SnS <sub>2</sub> @G                         | Li | 1339,54.1%(20)                                                                                                            | 670(60,20)                                                                                               | 632(0.04)                                                                      | 607(0.08)       | 572(0.16)       | 519(0.32)       | 463(0.64)     | <b>s12</b>       |
| SnS <sub>2</sub> /GNS-RS                    | Li | 1724, (58.4)                                                                                                              | 577(50,58.4)                                                                                             | 1000(0.006)                                                                    | 1000(0.03)      | 900(0.06)       | 700(0.29)       | 300(0.58)     | <b>s13</b>       |
| NC/SnS/G                                    | Li | 2070.3,62%(100)                                                                                                           | 500(25,100)                                                                                              | 740 (0.1)                                                                      | 555 (0.2)       | 370 (0.5)       | 230 (1)         | 120 (2)       | <b>s14</b>       |
| tin sulfides/NRGO                           | Li | 1240,47%(200)                                                                                                             | 562(200,200)                                                                                             | 597(0.2)                                                                       |                 |                 |                 | 402(2)        | <b>s15</b>       |
| SnS <sub>2</sub> NP/GNs                     | Li | 1830,49%(100)                                                                                                             | ~600(150,100)                                                                                            | 731(0.1)                                                                       | 674(0.5)        | 621(1)          | 525(5)          | 200(10)       | <b>s16</b>       |
| TC-RGO-CNT                                  | Li | 1401,50%(50)                                                                                                              | 500(150,50)                                                                                              | 600(0.05)                                                                      | 500(0.1)        | 340(0.2)        | 300(0.4)        | 100(0.8)      | <b>s17</b>       |
| C-SnS <sub>2</sub> @rGO                     | Li | 2349,58.1%(100)                                                                                                           | 704.0(1000,2000)                                                                                         | 1298(0.05)                                                                     | 1203 (0.1)      | 1021 (0.5)      | 930 (1)         | 749 (2)       | <b>s18</b>       |
| SnS <sub>2</sub> /Graphene/SnS <sub>2</sub> | Li | 1733.6,81%(100)                                                                                                           | 1357(200,100)                                                                                            | 1342 (1)                                                                       | 1244 (2)        | 1067 (5)        | 844 (10)        |               | <b>s19</b>       |
|                                             | Na | 1860,66.8%(100)                                                                                                           | 1133(100,100)                                                                                            | 1295 (0.1)                                                                     |                 | 950 (5)         | 765 (10)        |               |                  |
| SnS <sub>2</sub> -NGS                       | Li | 922.5,66%(200)                                                                                                            | 914(150,800)                                                                                             | 1183(0.2)                                                                      | 1020(0.5)       | 880(1)          | 750(2)          | 200(8)        | <b>s20</b>       |
|                                             | Na |                                                                                                                           | 450(100,200)                                                                                             | 630(0.2)                                                                       | 500(0.5)        | 430(1)          | 342(2)          | 180(8)        |                  |
| SnS <sub>2</sub> NC/EDA-RGO                 | Na |                                                                                                                           | 480(1000, 1000)                                                                                          | 760(0.18)                                                                      | 630(0.46)       | 560(0.93)       | 510(1.86)       | 315(7.43)     | <b>s21</b>       |

|                          |    |                  |              |          |           |         |         |          |            |
|--------------------------|----|------------------|--------------|----------|-----------|---------|---------|----------|------------|
| SnS <sub>2</sub> /G      | Na | 1250.1,69% (200) | 200(100,200) | 650(0.2) |           |         |         | 326(4)   | <b>s22</b> |
| SnS <sub>2</sub> -RGONRP | Na | 660,74.7% (200)  |              | 508(0.1) | 426 (0.5) | 398 (1) | 307 (5) | 244 (10) | <b>s23</b> |

---

## References

- s1. X. Jiang, X. Yang, Y. Zhu, J. Shen, K. Fan and C. Li, *J. Power Sources* 2013, **237**, 178.
- s2. Z. Jiang, C. Wang, G. Du, Y. J. Zhong and J. Z. Jiang, *J. Mater. Chem.* 2012, **22**, 9494.
- s3. P. Chen, Y. Su, H. Liu and Y. Wang, *Acs Appl. Mater. Inter.* 2013, **5**, 12073.
- s4. M. Wang, Y. Huang, Y. Zhu, X. Wu, N. Zhang and H. Zhang, *J. Alloys Compd.* 2019, **774**, 601.
- s5. J. Li, P. Wu, F. Lou, P. Zhang, Y. Tang, Y. Zhou and T. Lu, *Electrochim. Acta* 2013, **111**, 862.
- s6. J. Yin, H. Cao, Z. Zhou, J. Zhang and M. Qu, *J. Mater. Chem.* 2012, **22**, 23963.
- s7. Q. Wang, Y.-X. Nie, B. He, L.-L. Xing and X.-Y. Xue, *Solid State Sci.* 2014, **31**, 81.
- s8. D. Luo, F. Lin, W. Xiao, Z. Li, C. Luo and X. Li, *J. Chin. Chem. Soc-TAIP.* 2016, **63**, 902.
- s9. M. H. Modarres, H. W. Lim, C. George and M. D. Volder, *J. Phys. Chem. C* 2017, **121**, 13018.
- s10. Z. X. Huang, Y. Wang, J. I. Wong and H. Y. Yang, *2D Materials* 2015, **2**, 024010.
- s11. J. Li, S. Han, C. Zhang, W. Wei, M. Gu and L. Meng, *Acs Appl. Mater. Inter.* 2019, **11**, 22314.
- s12. X. Xie, D. Su, S. Chen, J. Zhang, S. Dou, P. Wang, #X and Guoxiu, *CHEM-ASIAN J.* 2014, **9**, 1611.
- s13. Marappan, Sathish, Satoshi, Mitani, Takaaki, Tomai, Itaru and Honma, *J. Phys. Chem. C* 2012, **116**, 12475.
- s14. T. Ma, L. Sun, Q. Niu, Y. Xu, K. Zhu, X. Liu, X. Guo and J. Zhang, *Electrochim. Acta* 2019, **300**, 131.
- s15. D. H. Youn, S. K. Stauffer, P. Xiao, H. Park, Y. Nam, A. Dolocan, G. Henkelman, A. Heller and C. B. Mullins, *Acs Nano* 2016, **10**, 10778.
- s16. Wei, Wei, Fang-Fang, Jia, Ke-Feng, Wang, Peng and Qu, *Chinese Chem. Lett.* 2017, **28**, 324.
- s17. A. Abbasnezhad, H. Asgharzadeh, A. A. Hamedani and S. H. Soytaş, *Dalton T* 2020, **49**, 5890.
- s18. Y. F. Li, S. G. Wang, Y. H. Shi, C. Y. Fan and H. M. Xie, *Dalton T*, 2020, **49**, 15874.
- s19. Y. Jiang, D. Song, J. Wu, Z. Wang, S. Huang, Y. Xu, Z. Chen, B. Zhao and J. Zhang, *Acs Nano* 2019, **13**, 9100.
- s20. Y. Jiang, Y. Feng, B. Xi, S. Kai, K. Mi, J. Feng, J. Zhang and S. Xiong, *J. Mater. Chem. A* 2016, **4**, 10719.
- s21. Xiong, Shenglin, Jiang, Yong, Wei, Min, Feng, Jinkui, Ma and Yuchen, *Energy Environ. Sci.* 2016, **9**, 1430.
- s22. Y. Liu, H. Kang, L. Jiao, C. Chen, K. Cao, Y. Wang and H. Yuan, *Nanoscale* 2015, **7**, 1325.
- s23. Y. Liu, Y. Yang, X. Wang, Y. Dong, Y. Tang, Z. Yu, Z. Zhao and J. Qiu, *ACS Appl. Mater. Inter.* 2017, **9(18)**, 15484.
